# Supplementary material for: Diphenylacrylonitrile-connected BODIPY dyes: fluorescence enhancement based on dark and AIE resonance energy transfer
Source: Royal Society of Chemistry journal article supplement (doi:10.1039/c7ob01270e), 2017-01-01
Supplement: c7ob01270e1.pdf [file c7ob01270e1.pdf]

## Supporting Information

# Diphenylacrylonitrile-connected BODIPY dyes: The fluorescence enhancement based on dark and AIE resonance energy transfer

Liangbin Lin,<sup>a</sup> Xiaoru Lin,<sup>a</sup> Hongyu Guo,<sup>a\*</sup> and Fafu Yang<sup>a,b,c\*</sup>

<sup>a</sup>College of Chemistry and Chemical Engineering, Fujian Normal University, Fuzhou 350007, P. R. China ;Tel: +0086-591-83465225; E-mail: yangfafu@fjnu.edu.cn

<sup>b</sup>Fujian Key Laboratory of Polymer Materials, Fuzhou 350007, P. R. China

<sup>c</sup>Fujian provincial Key Laboratory of Advanced Materials Oriented Chemical Engineering, Fuzhou 350007, P. R. China

E-mail: yangfafu@fjnu.edu.cn

## 1. General

All chemical reagents were obtained from commercial suppliers and used without further purification. The other organic solvents and inorganic reagents were purified according to standard anhydrous methods before use. TLC analysis was performed by using pre-coated glass plates. Column chromatography was carried out by using silica gel (200-300 mesh). NMR spectra were recorded in CDCl<sub>3</sub> on a Bruker-ARX 400 instrument at 25°C. Chemical shifts are reported in ppm, using tetramethylsilane (TMS) as internal standard. MS spectra were obtained from Bruker mass spectrometer. OH-Bodipy **6** was synthesized according to published procedure (Liu, J. Y.; Yeung, H. S.; Xu, W.; Li, X. Ng, D. K. P. *Org. Lett.* **2008**, *10*, 5421-5424).

UV-Vis were recorded on Varian UV-Vis spectrometer. Fluorescence spectra were measured in a conventional quartz cell (10×10×45 nm) at 25 °C on a Hitachi F-4500 spectrometer equipped with a constant-temperature water bath, with excitation and emission slits 10nm wide. The fluorescence absolute  $\Phi_F$  values were measured using an Edinburgh Instruments FLS920 Fluorescence Spectrometer with a 6-inch integrating sphere.

## 2. The synthetic process and characteristic spectra.

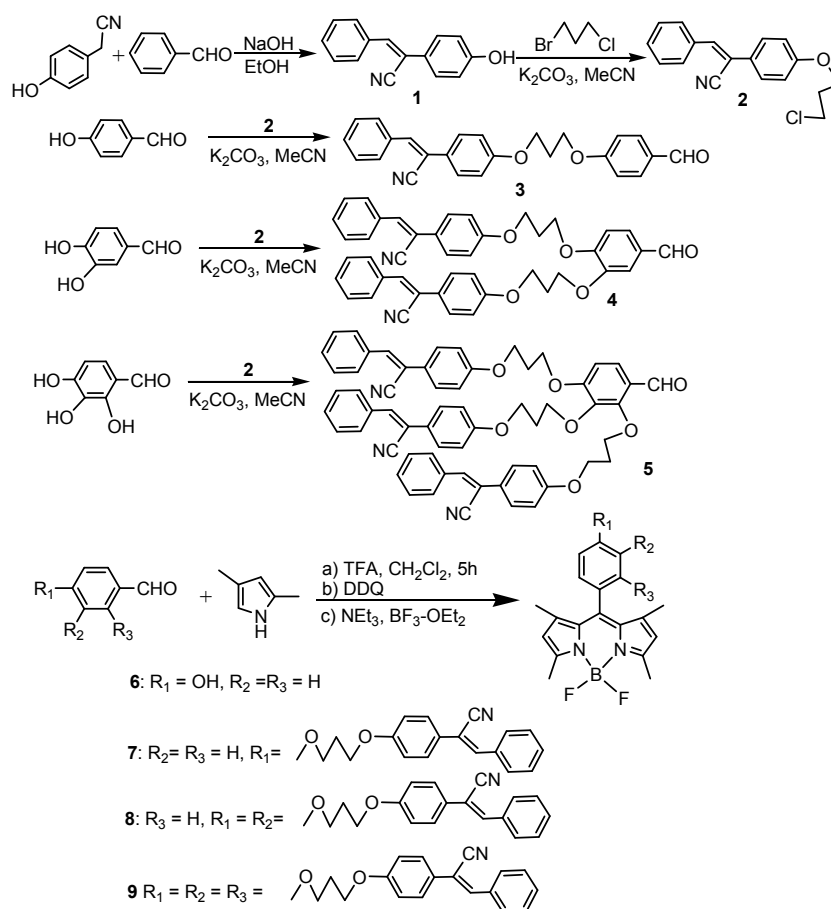

Scheme S1. Synthetic routes of compounds 7, 8 and 9

### 2.1 Synthesis of compound 1.

A mixture of 4-hydroxyphenylacetonitrile (0.51 g, 3.8 mmol), benzaldehyde (0.40 g, 3.8 mmol) and NaOH (0.30g, 7.5mmol) in 40 mL of EtOH solution was stirred for 10 h at room temperature. The reaction were detected by TLC technique, which suggested the disappearance of the materials. After reaction, 20 mL of HCl solution (1M) was poured into the reaction mixture. The precipitate was formed and filtered. The obtained precipitate was purified by recrystallization in MeOH/water (1:1, *V/V*). After dryness, compound 1 was collected as a pale yellow solid in yield of 80%. <sup>1</sup>H NMR (400 MHz, DMSO)  $\delta$ : 8.32(s, 1H, OH), 7.88(d, *J* = 8.0 Hz, 2H, ArH), 7.84(s, 1H, CH), 7.59 (d, *J* = 8.0 Hz, 2H, ArH), 7.46-7.54 (m, 3H, ArH), 6.89 (d, *J* = 8.0 Hz, 2H, ArH).

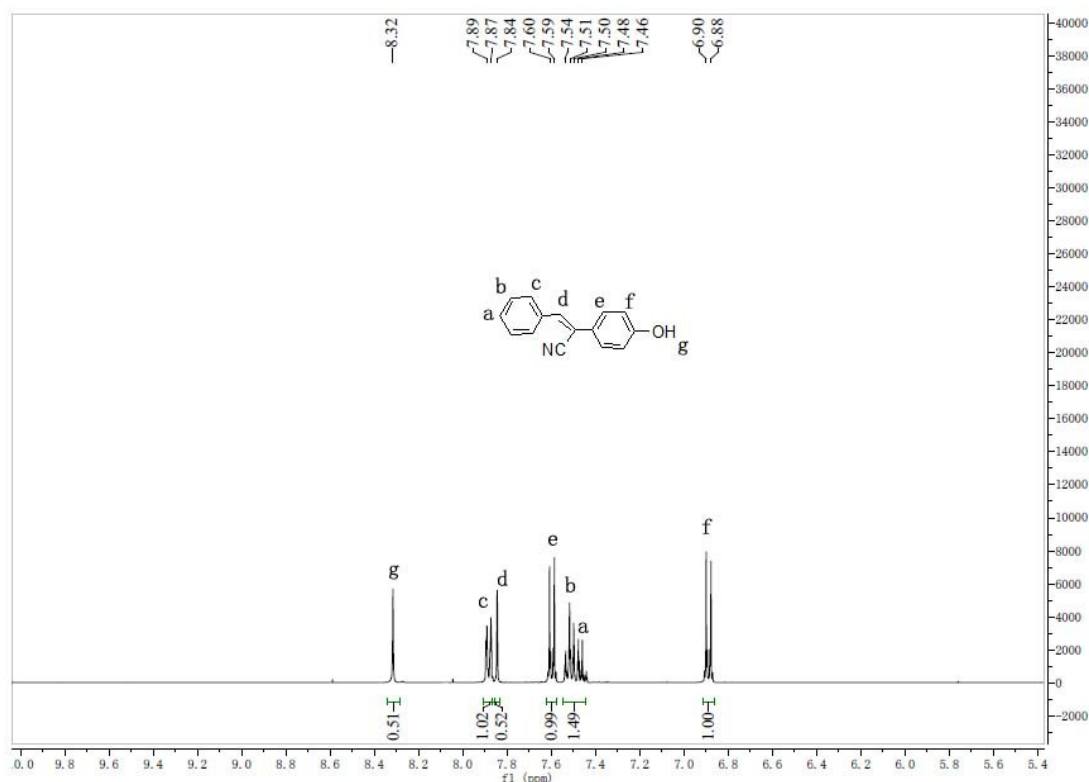

Figure S1. The  $^1\text{H}$  NMR spectrum of compound **1**

## 2.2 Synthesis of compound **2**.

Under  $\text{N}_2$  atmosphere, a mixture of compound **1** (0.33g, 1.5mmol), 1-bromo-3-chloropropane (0.44g, 2.8mmol), and  $\text{K}_2\text{CO}_3$  (0.36g, 2.6 mmol) was stirred and refluxed in 30 mL of dry MeCN for 24 h at  $88^\circ\text{C}$ . The reaction was monitored by TLC technique implying the disappearance of reactants. After reaction, the mixture was treated with 50 mL of HCl (1 M) and extracted with 40 mL of  $\text{CHCl}_3$ . The  $\text{CHCl}_3$  layer was partitioned, washed by 20 mL of distilled water, dried over anhydrous  $\text{MgSO}_4$ , and then concentrated. The residue was treated by 20 mL of MeOH and the precipitate was obtained. The crude product was further purified by recrystallization in MeOH/ $\text{CH}_2\text{Cl}_2$  (2:1,  $V/V$ ). After dryness, compound **2** was collected as a pale yellow solid in yield of 72%.  $^1\text{H}$  NMR (400 MHz,  $\text{CDCl}_3$ )  $\delta$ : 7.84(s, 1H, CH), 7.63(d,  $J = 8.0$  Hz, 2H, ArH), 7.43-7.48 (m, 3H, ArH), 7.04 (d,  $J = 8.0$  Hz, 2H, ArH), 6.99 (d,  $J = 8.0$  Hz, 2H, ArH), 4.29 (t,  $J = 8.0$  Hz, 2H,  $\text{ClCH}_2$ ), 4.24 (t,  $J = 8.0$  Hz, 2H,  $\text{OCH}_2$ ), 2.35 (m, 2H,  $\text{CH}_2$ ).

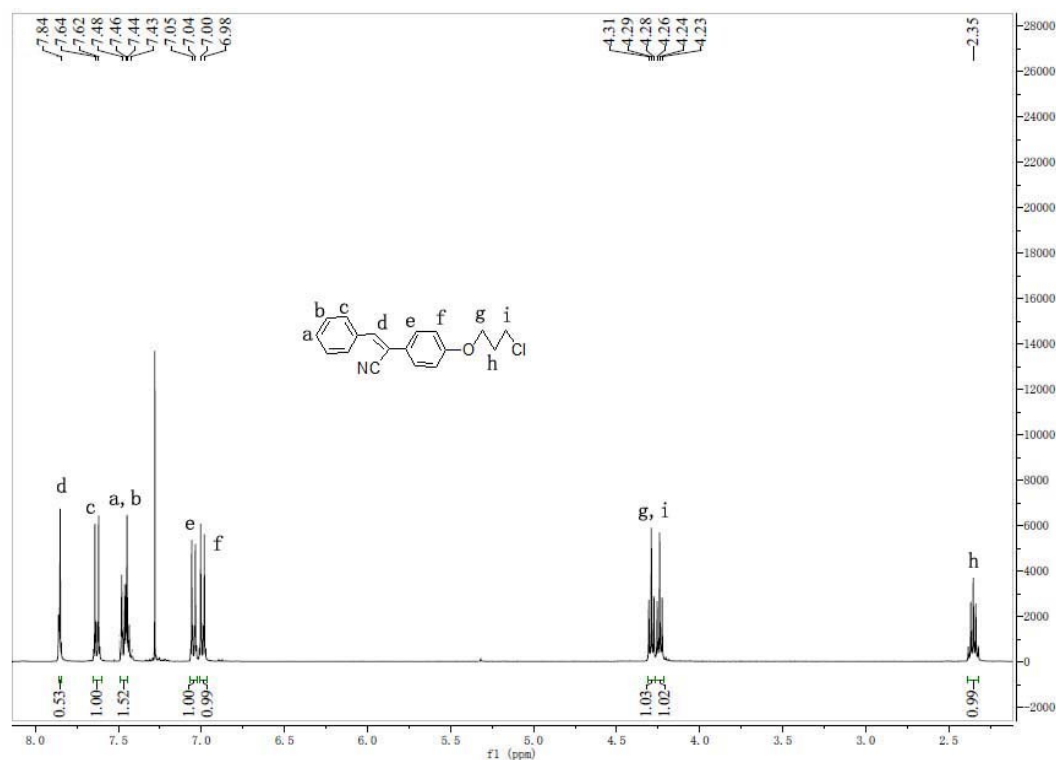

Figure S2. The  $^1\text{H}$  NMR spectrum of compound **2**

### 2.3 Synthesis of compound **3**.

Under  $\text{N}_2$  atmosphere, a mixture of compound **2** (0.30g, 1.0mmol), 4-hydroxybenzaldehyde (0.20g, 1.6mmol),  $\text{K}_2\text{CO}_3$  (0.28g, 2.0 mmol) and KI (0.1g, 0.6 mmol) was stirred and refluxed in 20 mL of dry MeCN for 20 h at 90 °C. The reaction was monitored by TLC technique implying the disappearance of reactants. After reaction, the mixture was treated with 40 mL HCl (1 M) and extracted with 30 mL  $\text{CHCl}_3$ . The  $\text{CHCl}_3$  layer was partitioned, washed by 20 mL of distilled water, dried over anhydrous  $\text{MgSO}_4$ , and then concentrated. The residue was treated by 15 mL of MeOH and the precipitate was obtained. The crude product was further purified by column chromatography using  $\text{CH}_2\text{Cl}_2$ /hexane (1:1,  $V/V$ ) as eluant. After dryness, compound **3** was collected as a pale yellow solid in yield of 85%.  $^1\text{H}$  NMR (400 MHz,  $\text{CDCl}_3$ )  $\delta$ : 9.89 (s, 1H, CHO), 7.83-7.87 (m, 4H, ArH and CH), 7.61(d,  $J = 8.0$  Hz, 2H, ArH), 7.40-7.48 (m, 4H, ArH), 7.01 (d,  $J = 8.0$  Hz, 2H, ArH), 6.97 (d,  $J = 8.0$  Hz, 2H, ArH), 4.27 (t,  $J = 8.0$  Hz, 2H,  $\text{OCH}_2$ ), 4.22 (t,  $J = 8.0$  Hz, 2H,  $\text{OCH}_2$ ), 2.30-2.36 (m, 2H,  $\text{CH}_2$ ). MALDI-TOF-MS ( $\text{C}_{25}\text{H}_{21}\text{NO}_3$ ) Calcd.for  $m/z = 383.5$ , found:  $m/z = 385.9$  ( $\text{MH}^+$ ).

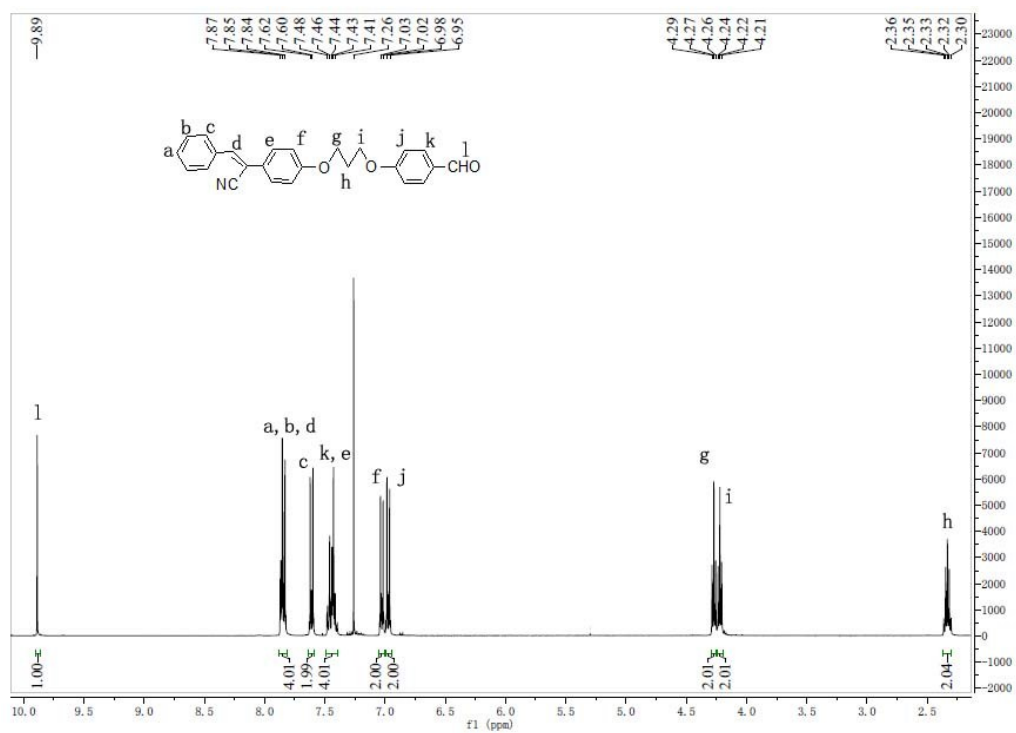

Figure S3. The <sup>1</sup>H NMR spectrum of compound 3

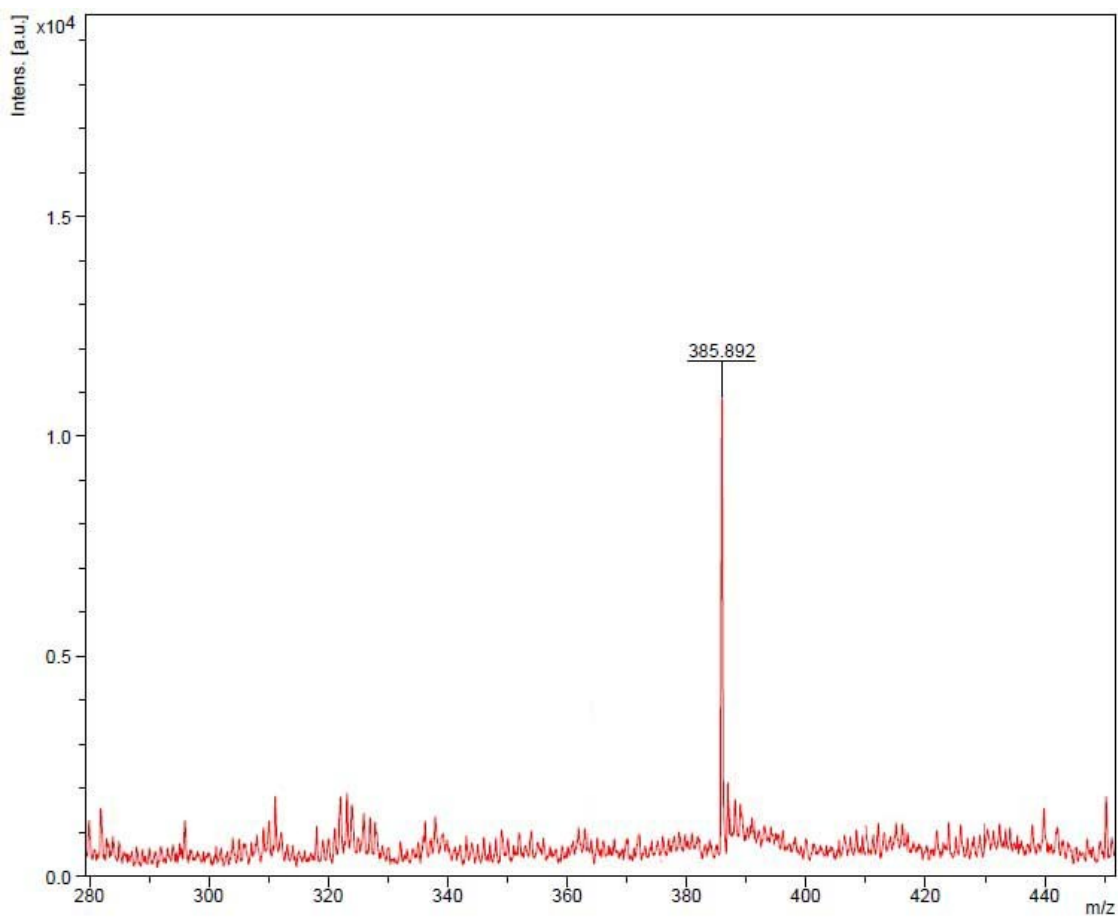

Figure S4. The MALDI-TOF-MS spectrum of compound 3

## 2.4 Synthesis of compound 4.

Under N<sub>2</sub> atmosphere, a mixture of compound 2 (0.30g, 1.0mmol), 3,4-dihydroxybenzaldehyde (0.07g, 0.5mmol), K<sub>2</sub>CO<sub>3</sub> (0.42g, 3.0 mmol) and KI (0.1g, 0.6 mmol) was stirred and refluxed in 20 mL of dry MeCN for 36 h at 90 °C. The reaction was monitored by TLC technique implying the disappearance of reactants. After reaction, the mixture was treated with 40 mL of HCl (1 M) and extracted with 30 mL of CHCl<sub>3</sub>. The CHCl<sub>3</sub> layer was partitioned, washed by 20 mL of distilled water, dried over anhydrous MgSO<sub>4</sub>, and then concentrated. The residue was treated by 15 mL of MeOH and the precipitate was obtained. The crude product was further purified by column chromatography using CH<sub>2</sub>Cl<sub>2</sub>/hexane (2:1, V/V) as eluant. After dryness, compound 4 was collected as a pale yellow solid in yield of 71%. <sup>1</sup>H NMR (400 MHz, CDCl<sub>3</sub>) δ: 9.85 (s, 1H, CHO), 7.83 (d, *J* = 8.0 Hz, 4H, ArH), 7.57(d, *J* = 8.0 Hz, 4H, ArH), 7.37-7.46 (m, 10H, ArH and CH), 7.02 (d, *J* = 8.0 Hz, 1H, ArH), 6.94 (d, *J* = 8.0 Hz, 2H, ArH), 6.95 (d, *J* = 8.0 Hz, 2H, ArH), 4.28-4.31 (m, 4H, OCH<sub>2</sub>), 4.22 (t, *J* = 8.0 Hz, 4H, OCH<sub>2</sub>), 2.31-2.36 (m, 4H, CH<sub>2</sub>). MALDI-TOF-MS (C<sub>43</sub>H<sub>36</sub>N<sub>2</sub>O<sub>5</sub>) Calcd. for *m/z* = 660.7, found: *m/z* = 683.8 (MNa<sup>+</sup>).

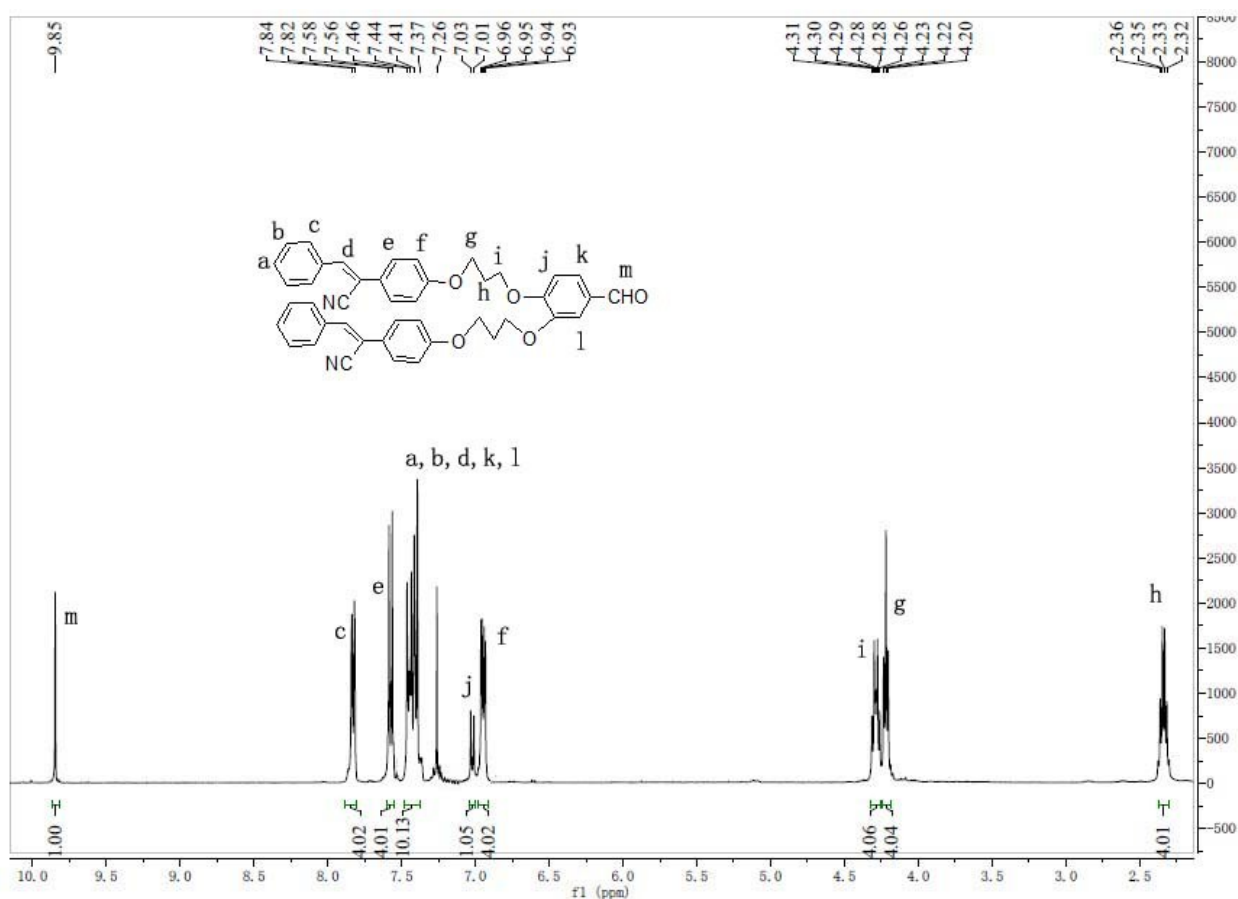

Figure S5. The <sup>1</sup>H NMR spectrum of compound 4

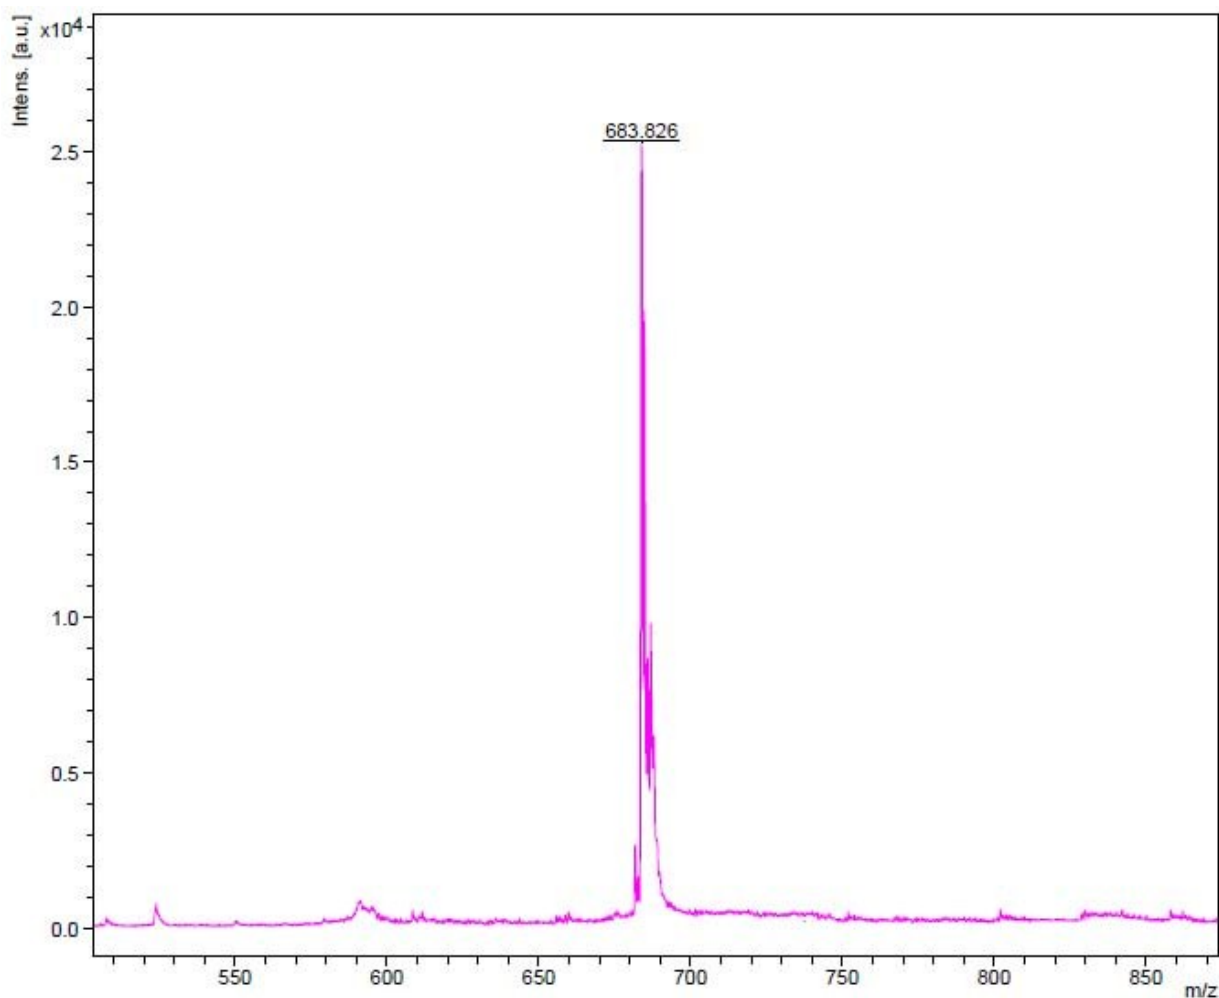

Figure S6. The MALDI-TOF-MS spectrum of compound **4**

## 2.5 Synthesis of compound **5**.

Under N<sub>2</sub> atmosphere, a mixture of compound **2** (0.50g, 1.7mmol), 2,3,4-trihydroxybenzaldehyde (0.07g, 0.5mmol), K<sub>2</sub>CO<sub>3</sub> (0.66g, 4.8 mmol) and KI (0.1g, 0.6 mmol) was stirred and refluxed in 20 mL of dry MeCN for 48 h at 90 °C. The reaction was monitored by TLC technique implying the disappearance of reactants. After reaction, the mixture was treated with 40 mL of HCl (1 M) and extracted with 30 mL of CHCl<sub>3</sub>. The CHCl<sub>3</sub> layer was partitioned, washed by 20 mL of distilled water, dried over anhydrous MgSO<sub>4</sub>, and then concentrated. The residue was treated by 15 mL of MeOH and the precipitate was obtained. The crude product was further purified by column chromatography using CH<sub>2</sub>Cl<sub>2</sub>/hexane (4:1, *V/V*) as eluant. After dryness, compound **5** was collected as a pale yellow solid in yield of 66%. <sup>1</sup>H NMR (400 MHz, CDCl<sub>3</sub>) δ: 10.24 (s, 1H, CHO), 6.89-7.86 (m, 31H, ArH), 6.81 (d, *J* = 8.0 Hz, 1H, ArH), 4.37 (t, *J* = 8.0 Hz, 2H, OCH<sub>2</sub>), 4.27 (t, *J* = 8.0 Hz, 2H, OCH<sub>2</sub>), 4.12-4.28 (m, 8H, OCH<sub>2</sub>), 2.12-2.31 (m, 6H, CH<sub>2</sub>). MALDI-TOF-MS (C<sub>61</sub>H<sub>51</sub>N<sub>3</sub>O<sub>7</sub>) Calcd.for *m/z* = 938.1, found: *m/z* = 976.7 (MK<sup>+</sup>).

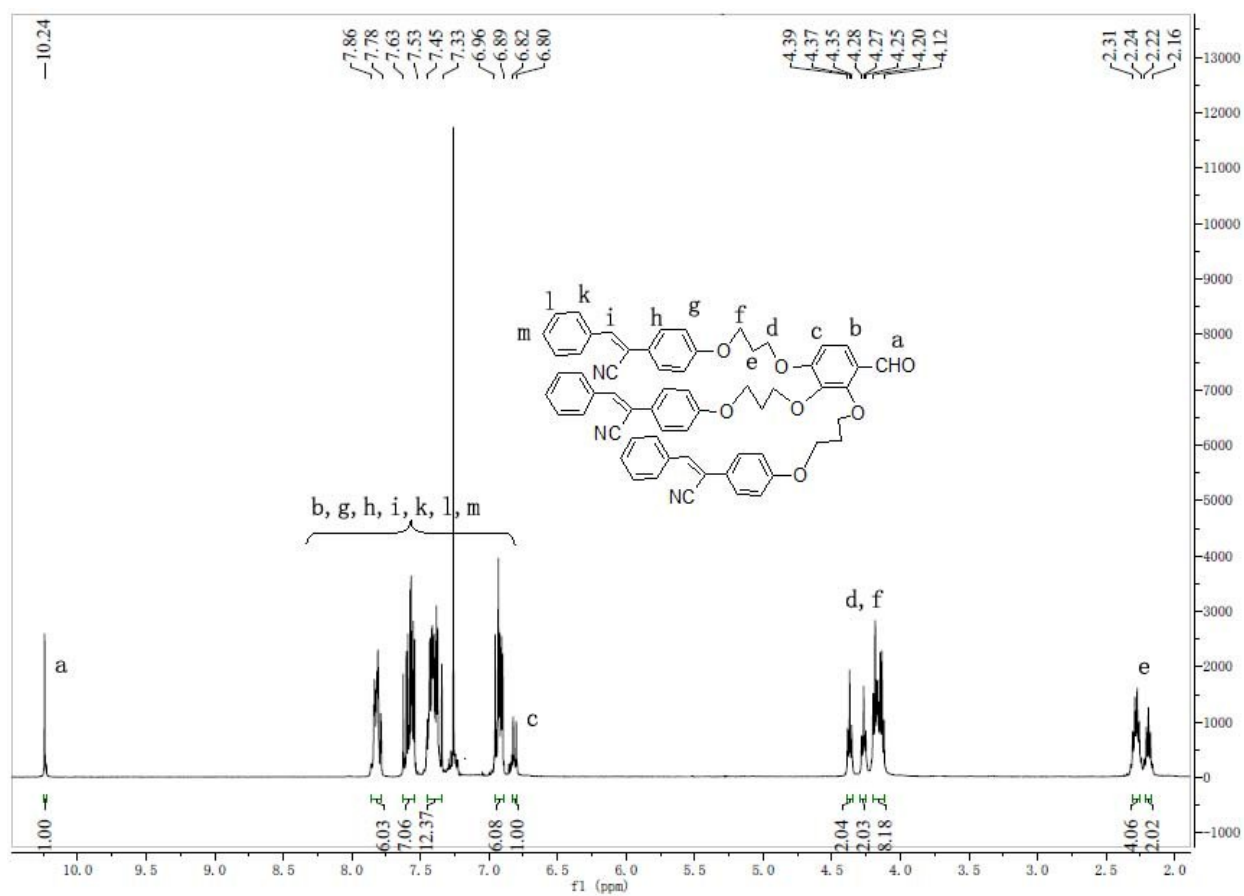

Figure S7. The  $^1\text{H}$  NMR of compound **5**

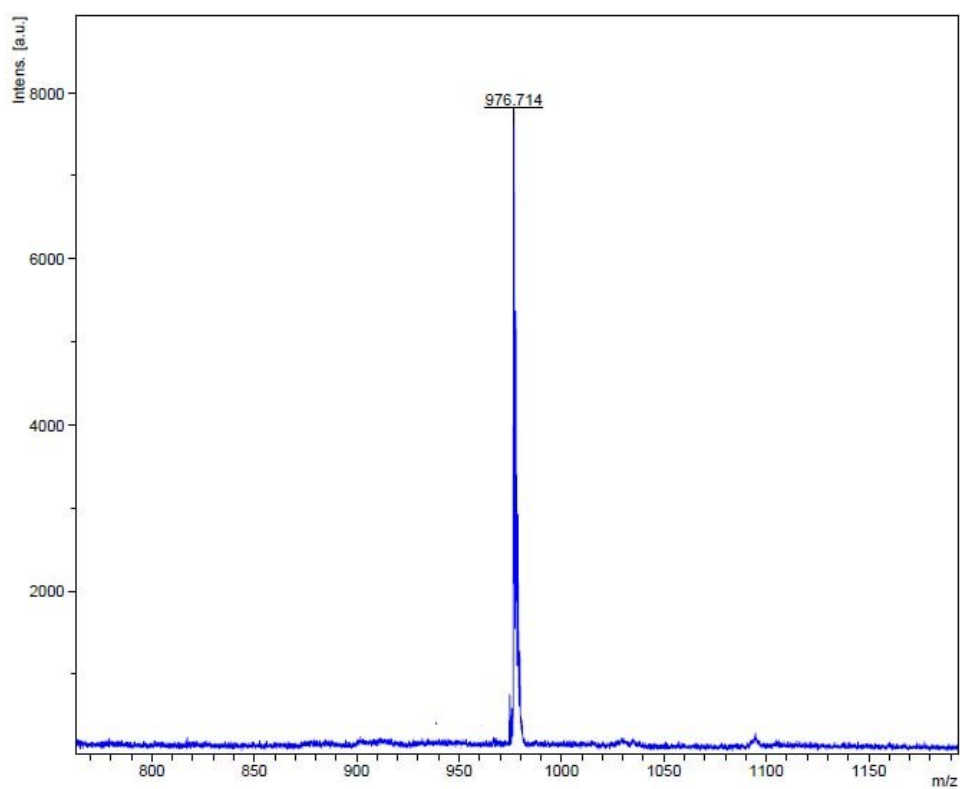

Figure S8. The MALDI-TOF-MS spectrum of compound **5**



## 2.6 Syntheses of compounds 7, 8, 9.

Under the protection of N<sub>2</sub> atmosphere, three drops of trifluoroacetic acid was added in the CH<sub>2</sub>Cl<sub>2</sub> (90 mL) solution containing formyl derivative **3** (**4** or **5**, 1 mmol) and 2,4-dimethyl-1*H*-pyrrole (0.21 g, 2.3 mmol). The mixture was stirred at room temperature for 8 h. 2,3-dichloro-5,6-dicyano-*p*-benzoquinone (0.25 g, 1.1 mmol) was added in the reaction mixture. The mixture was reacted under room temperature for another 4 h. Furthermore, triethylamine (9.7 mL, 0.07 mol) and BF<sub>3</sub>·Et<sub>2</sub>O (9.7 mL, 0.08 mol) was successively added into the mixture. The mixture was stirred unceasingly overnight at room temperature. After reaction, the obtained mixture was partitioned by water (ca. 100 mL). The organic layer was separated, washed with NaHCO<sub>3</sub> solution (5%, 100 mL) and distilled water (100 mL × 2). The organic portion was dried over anhydrous MgSO<sub>4</sub> and then was concentrated under reduced pressure. The crude product was purified by column chromatography (eluent: CH<sub>2</sub>Cl<sub>2</sub>). Compounds **7**, **8** and **9** were collected as red solids in yields of 28%, 24% and 21%, respectively.

Compound **7**: <sup>1</sup>H NMR (400 MHz, CDCl<sub>3</sub>) δppm: 1.43 (s, 6H, CH<sub>3</sub>), 2.34 (s, 2H, *J* = 7.2Hz, CH<sub>2</sub>), 2.55 (s, 6H, CH<sub>3</sub>), 4.21~4.26 (m, 4H, OCH<sub>2</sub>), 5.97 (s, 2H, ArH), 7.00 (d, 2H, *J* = 8.0Hz, ArH), 7.02 (d, 2H, *J* = 8.0Hz, ArH), 7.16 (d, 2H, *J* = 8.0Hz, ArH), 7.42-7.46 (m, 4H, ArH), 7.62 (d, 2H, *J* = 8.0Hz, ArH), 7.86 (d, 2H, *J* = 8.0Hz, ArH); <sup>13</sup>C NMR (100 MHz, CDCl<sub>3</sub>) δppm: 14.65, 29.27, 53.47, 64.40, 64.59, 111.13, 114.97, 118.05, 121.14, 127.39, 128.95, 129.09, 129.26, 130.23, 140.28, 141.72, 143.16, 155.28, 159.38, 159.70; MALDI-TOF-MS Calcd. for *m/z* = 601.1, found: *m/z* = 602.1(MH<sup>+</sup>). HR-MS(ESI) (C<sub>37</sub>H<sub>34</sub>BF<sub>2</sub>N<sub>3</sub>O<sub>2</sub>) [M+K]<sup>+</sup>: Calcd.: 640.2350. found: 640.2361(MK<sup>+</sup>), 624.2610 (MNa<sup>+</sup>).

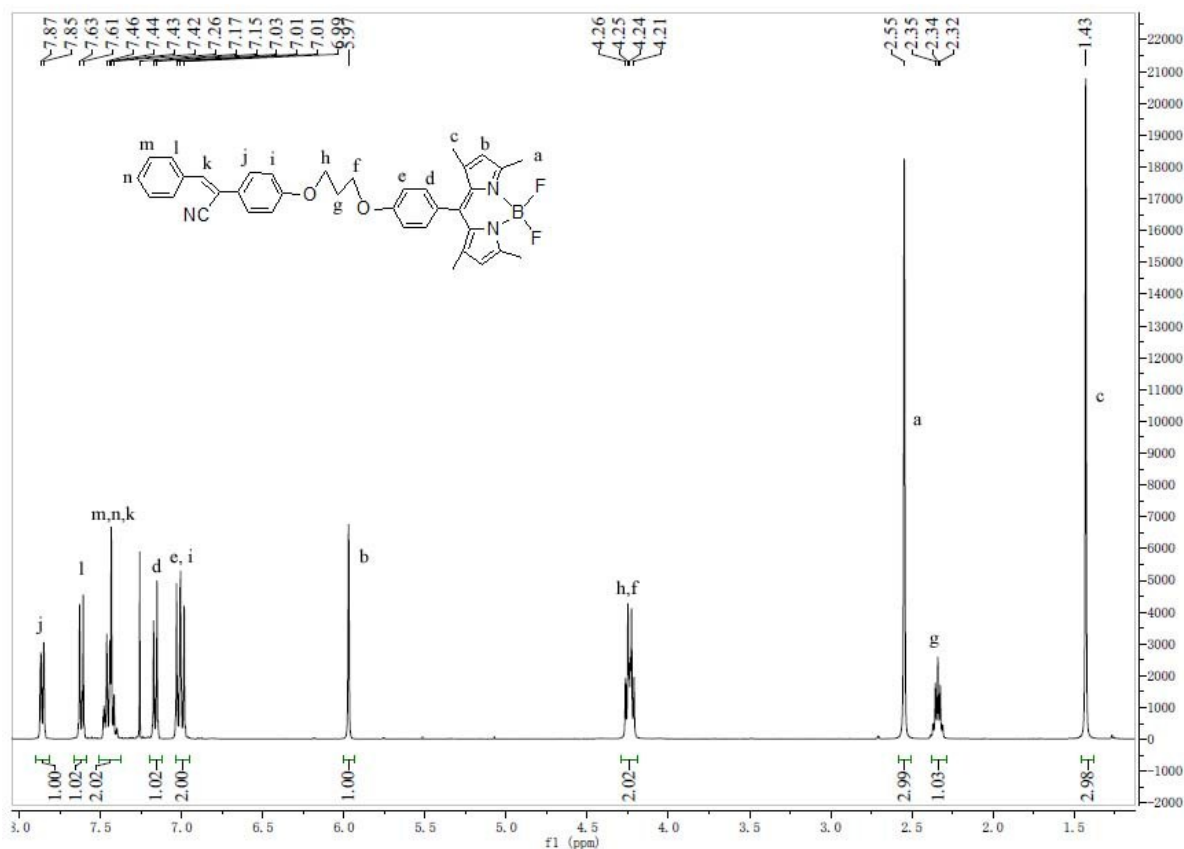

Figure S9. The <sup>1</sup>H NMR of compound **7**

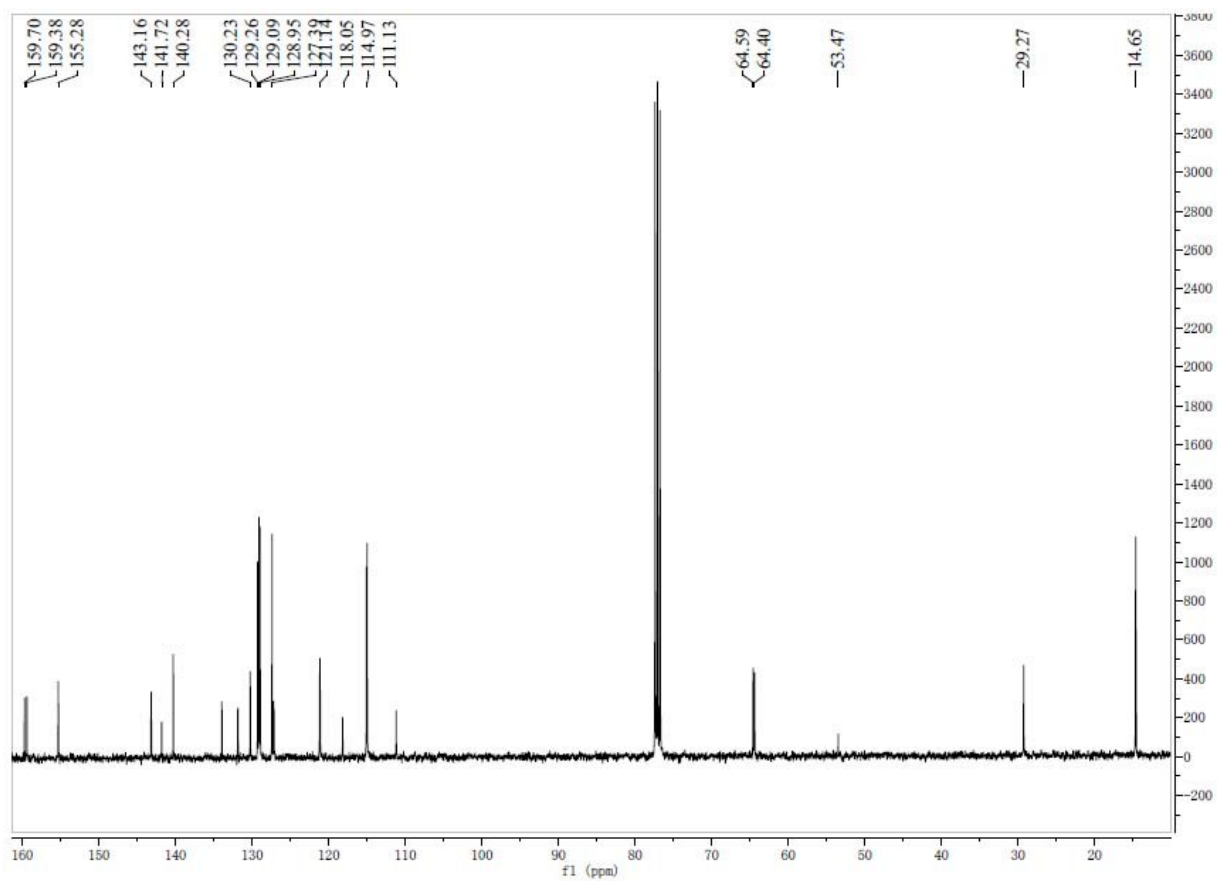

Figure S10. The  $^{13}\text{C}$  NMR of compound 7

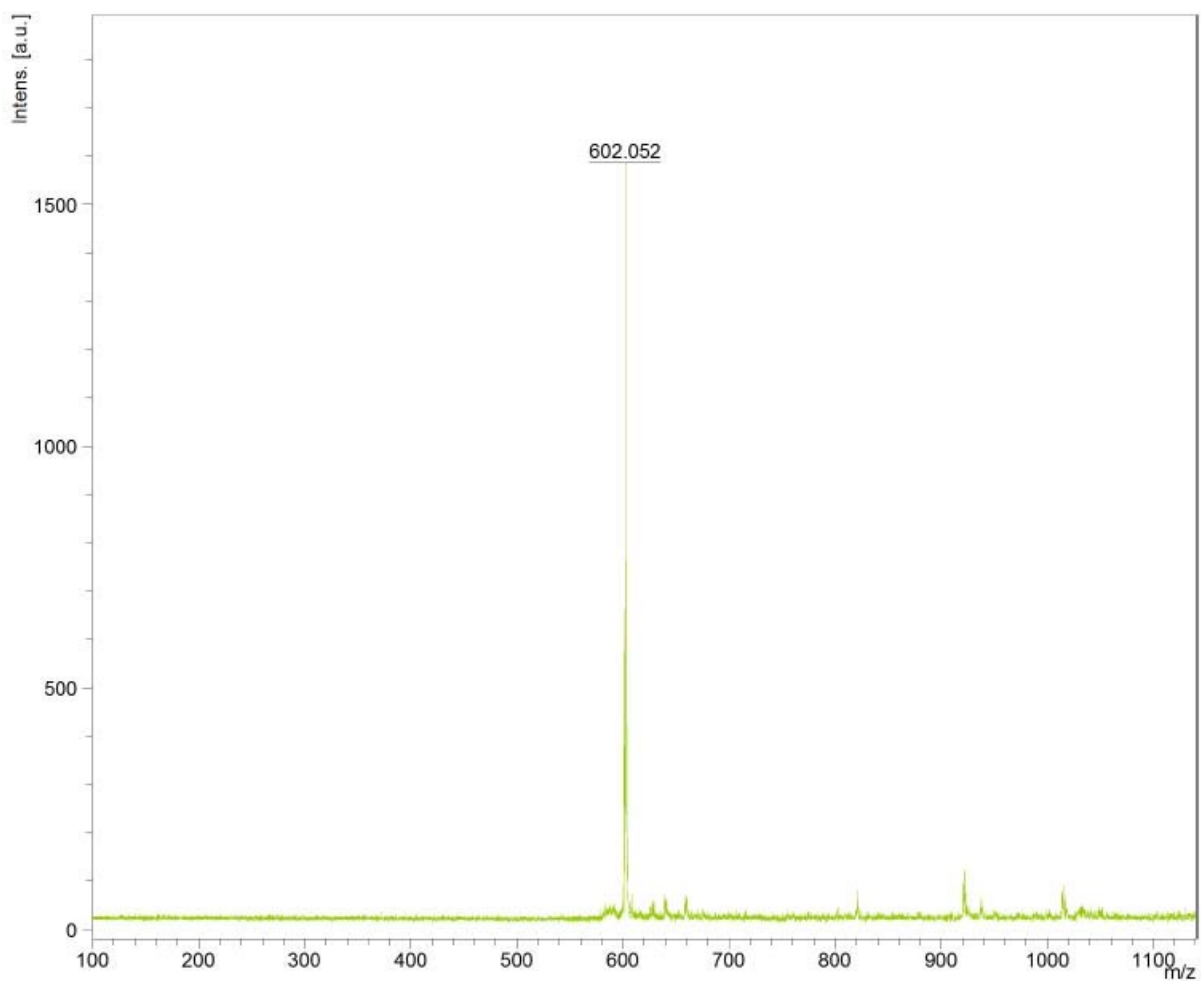

Figure S11. The MALDI-TOF-MS spectrum of compound **7**

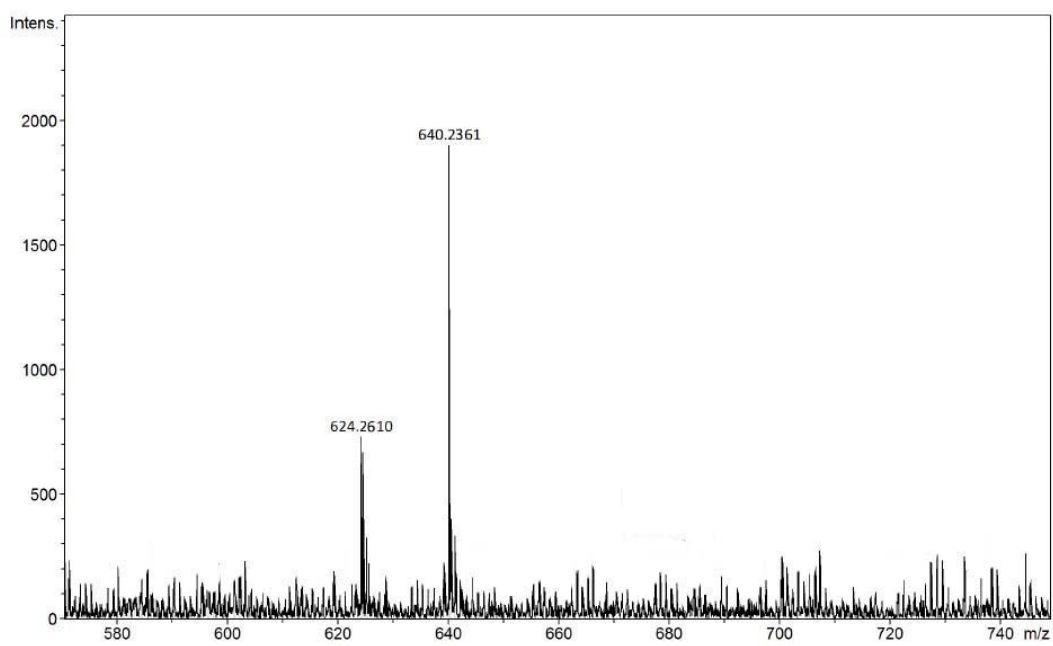

Figure S12. The HR-MS spectrum of compound **7**

Compound **8**:  $^1\text{H}$  NMR (400 MHz,  $\text{CDCl}_3$ )  $\delta$ ppm: 1.46 (s, 6H,  $\text{CH}_3$ ), 2.24-2.35 (m, 4H,  $\text{CH}_2$ ), 2.54 (s, 6H,  $\text{CH}_3$ ), 4.13~4.26 (m, 8H,  $\text{OCH}_2$ ), 5.97 (s, 2H, ArH), 6.80-7.86 (m, 23H, CH and ArH);  $^{13}\text{C}$  NMR (100 MHz,  $\text{CDCl}_3$ )  $\delta$ ppm: 14.59, 29.37, 29.71, 31.94, 64.45, 64.53, 65.56, 65.94, 111.15, 113.62, 113.99, 114.90, 118.14, 120.33, 121.02, 121.16, 128.56, 128.92, 129.63, 140.27, 142.92, 143.08, 149.34, 155.44, 159.49, 159.69; MALDI-TOF-MS Calcd. for  $m/z = 878.4$ , found:  $m/z = 860.7(\text{M-F})^+$ . HR-MS(ESI) ( $\text{C}_{55}\text{H}_{49}\text{BF}_2\text{N}_4\text{O}_4$ )  $[\text{M-F}]^+$ : Calcd.: 859.3835. found: 859.3852.

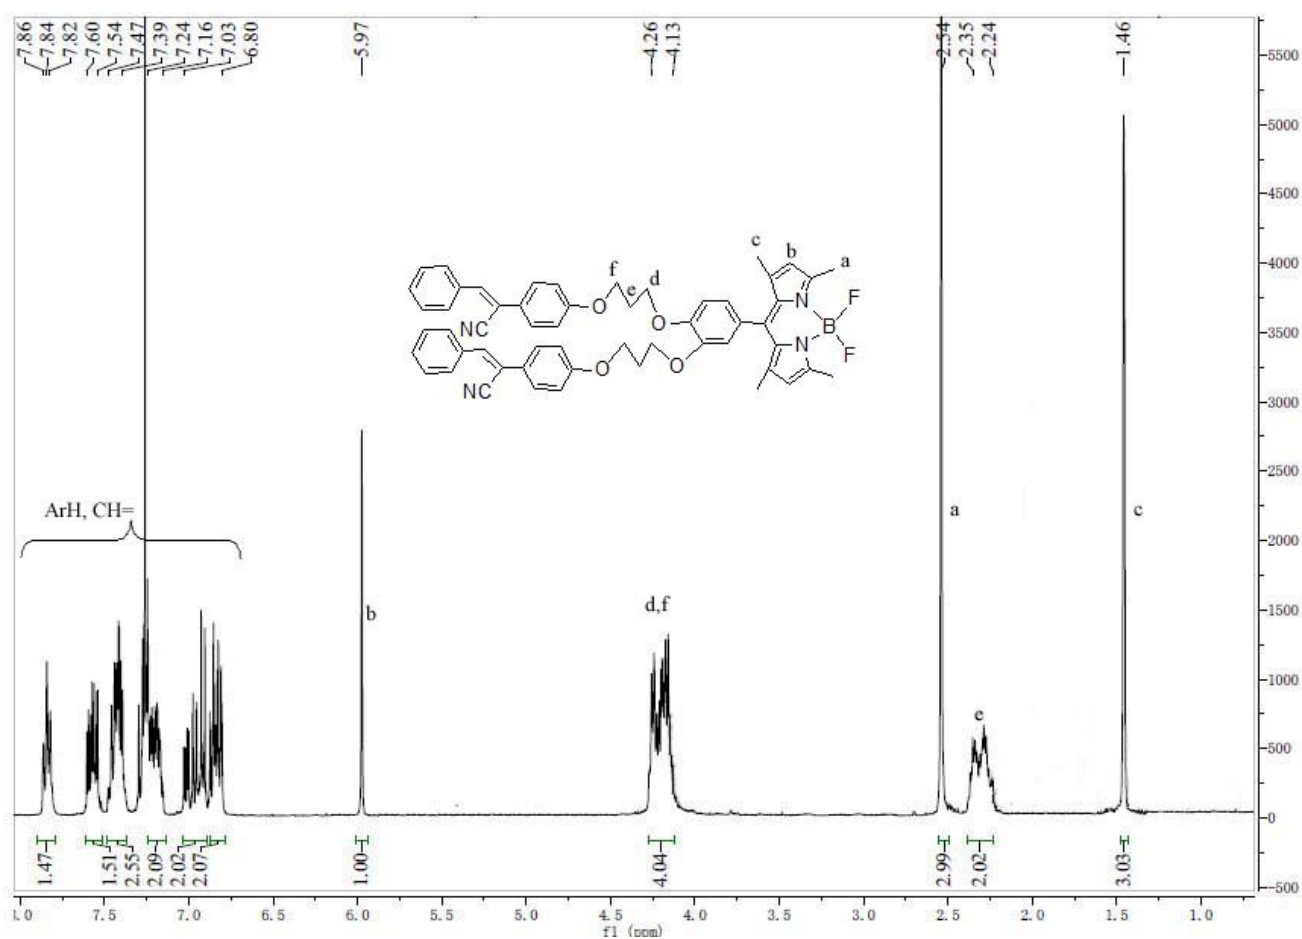

Figure S13. The  $^1\text{H}$  NMR of compound **8**

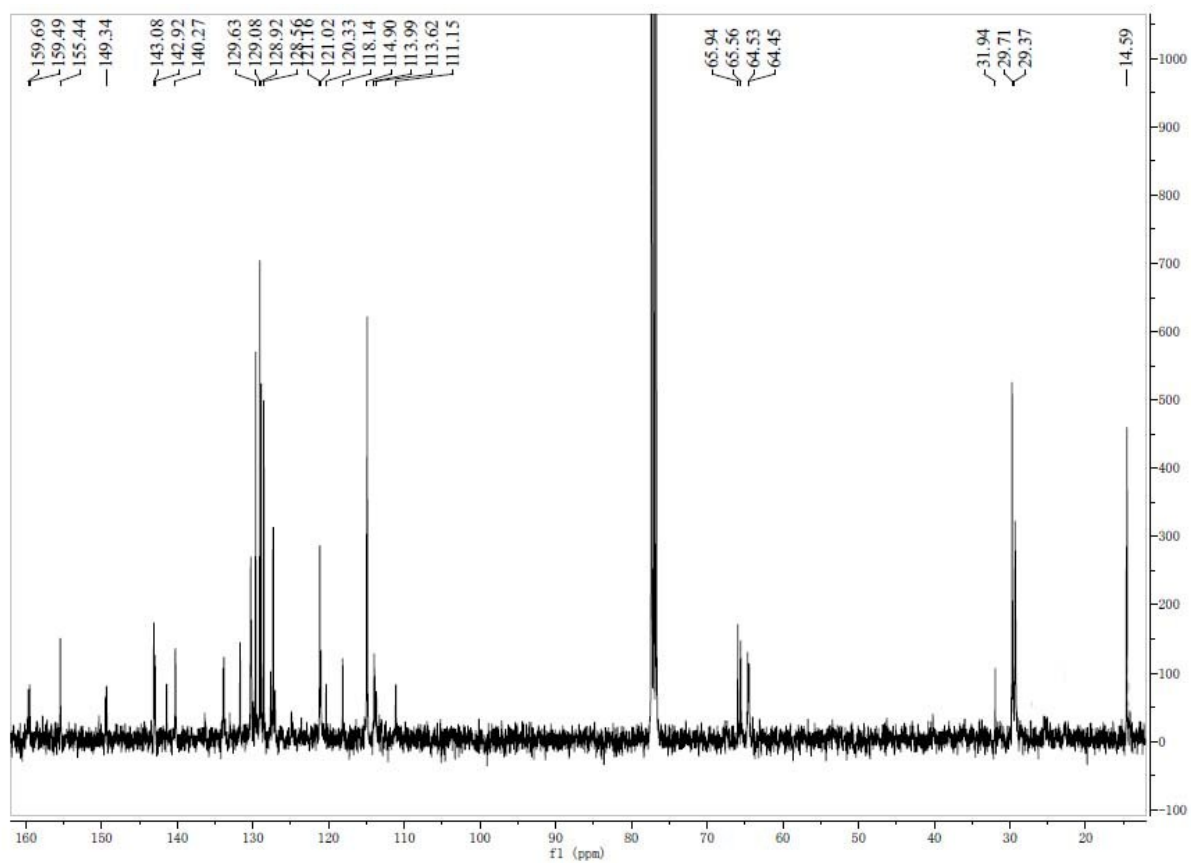

Figure S14. The  $^{13}\text{C}$  NMR of compound **8**

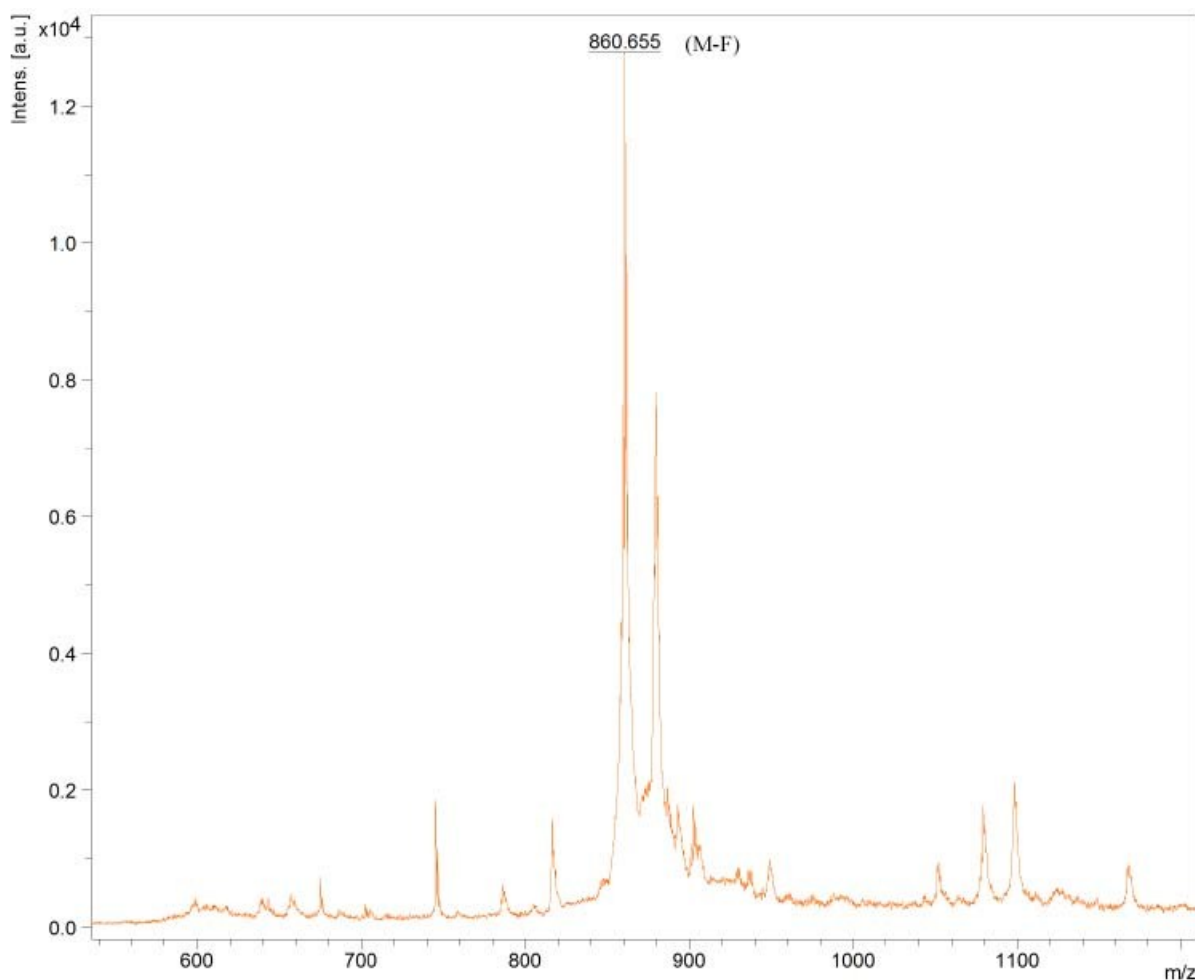

Figure S15. The MALDI-TOF-MS spectrum of compound **8**

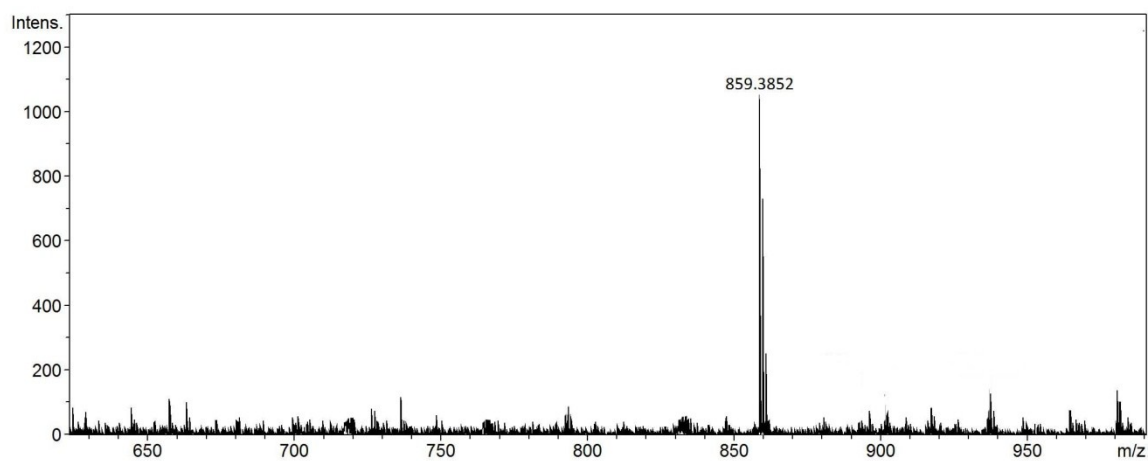

Figure S16. The HR-MS spectrum of compound **8**

Compound **9**:  $^1\text{H}$  NMR (400 MHz,  $\text{CDCl}_3$ )  $\delta$ ppm: 1.46 (s, 6H,  $\text{CH}_3$ ), 1.92-2.33 (m, 6H,  $\text{CH}_2$ ), 2.54 (s, 6H,  $\text{CH}_3$ ), 3.79 (t, 2H,  $J=7.2$  Hz,  $\text{OCH}_2$ ), 4.16~4.26 (m, 10H,  $\text{OCH}_2$ ), 5.91 (s, 2H, ArH), 6.79-7.85 (m, 32H, CH and ArH);  $^{13}\text{C}$  NMR (100 MHz,  $\text{CDCl}_3$ )  $\delta$ ppm: 14.30, 29.30, 29.74, 30.15, 31.97, 64.29, 64.53, 65.35, 65.62, 69.49, 69.77, 108.92, 110.97, 111.17, 114.90, 118.22, 121.21, 121.69, 124.06,

126.55, 126.91, 127.17, 127.37, 128.91, 129.09, 130.09, 130.24, 131.86, 133.87, 134.01, 139.35, 139.86, 140.01, 140.28, 141.96, 142.50, 150.04, 154.13, 155.26, 159.67; MALDI-TOF-MS Calcd. for  $m/z = 1136.5$ , found: 1138.1(M-F)<sup>+</sup>. HR-MS(ESI) (C<sub>73</sub>H<sub>64</sub>BF<sub>2</sub>N<sub>5</sub>O<sub>6</sub>) [M-F]<sup>+</sup>: Calcd.: 1136.4939. found: 1136.4933(M-F)<sup>+</sup>.

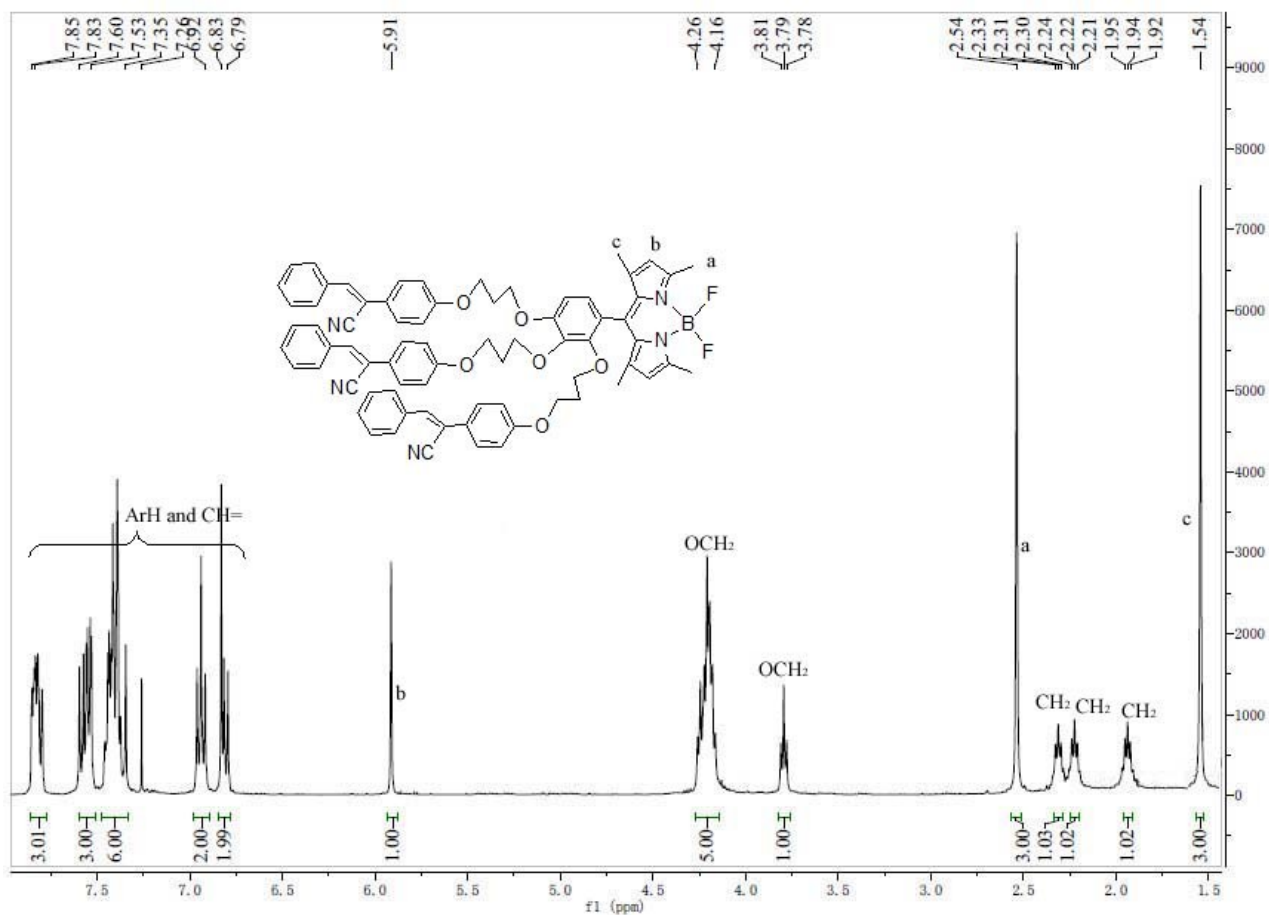

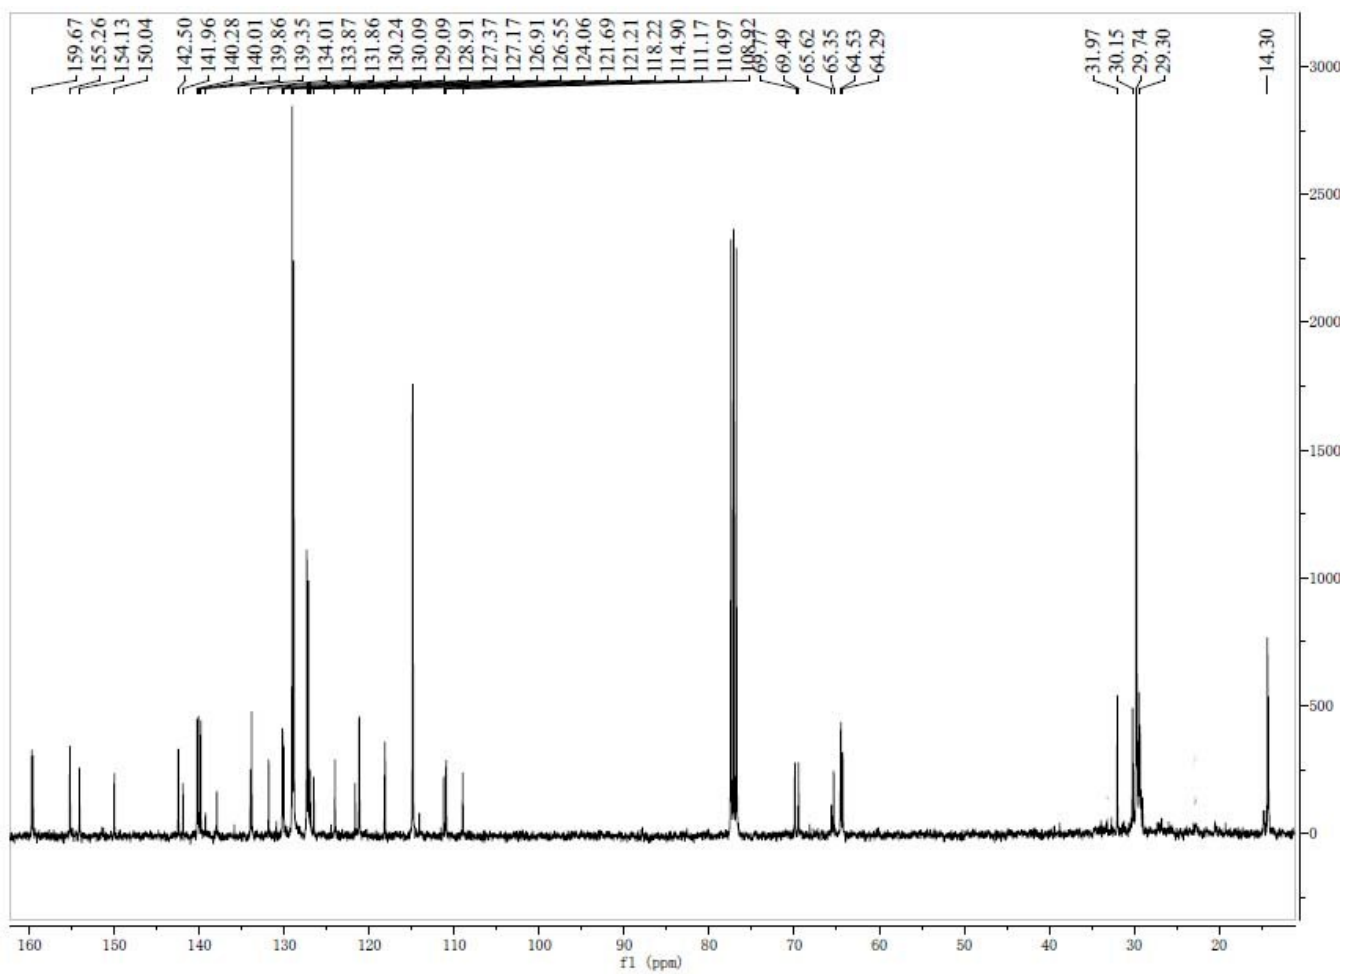

Figure S18. The  $^{13}\text{C}$  NMR of compound 9



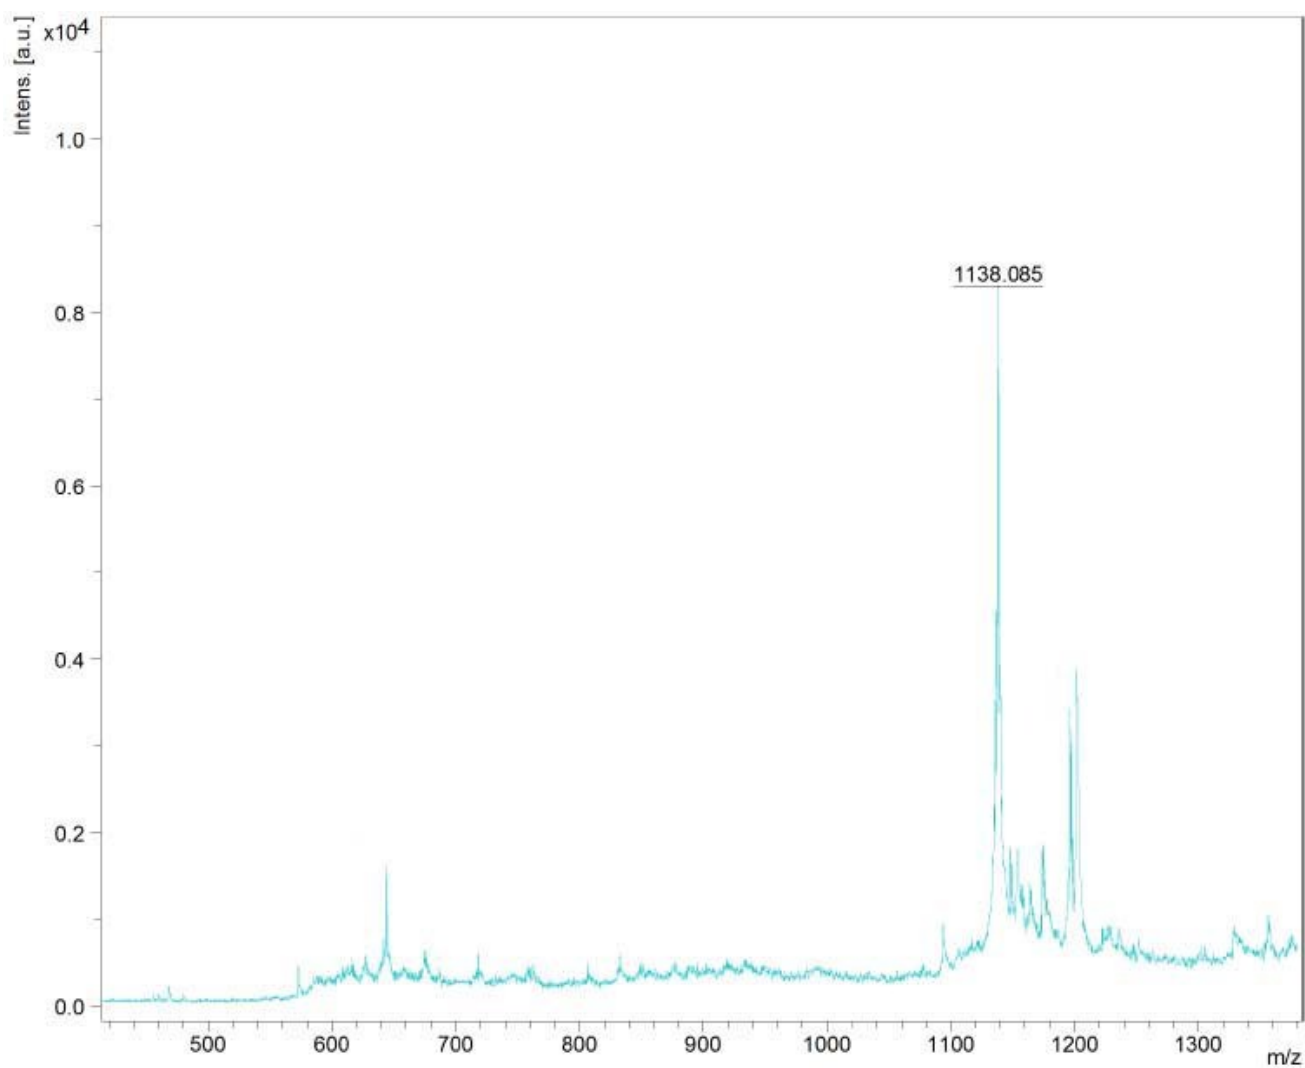

Figure S19. The MALDI-TOF-MS spectrum of compound **9**

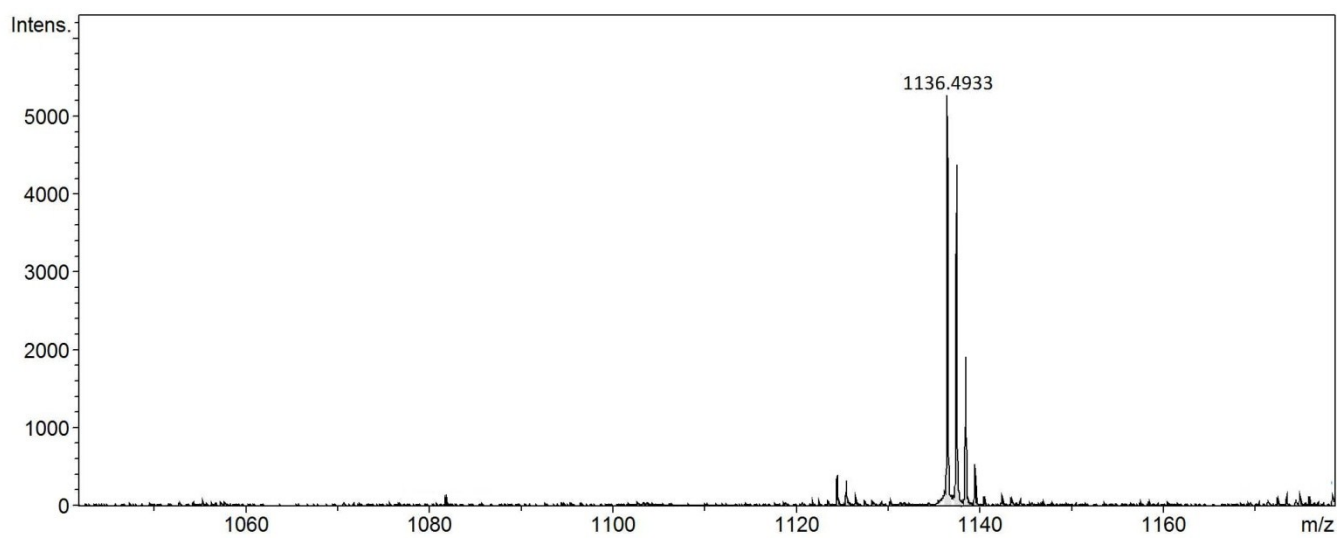

Figure S20. The HR-MS spectrum of compound **9**

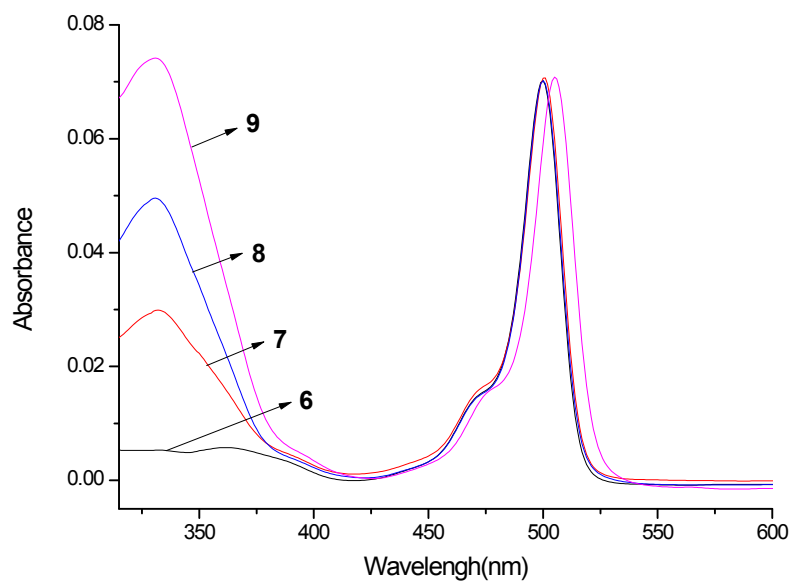

**Figure S21** The UV-Vis absorption spectra of compounds **6**, **7**, **8** and **9** in THF solution ( $1 \times 10^{-6}$  M).

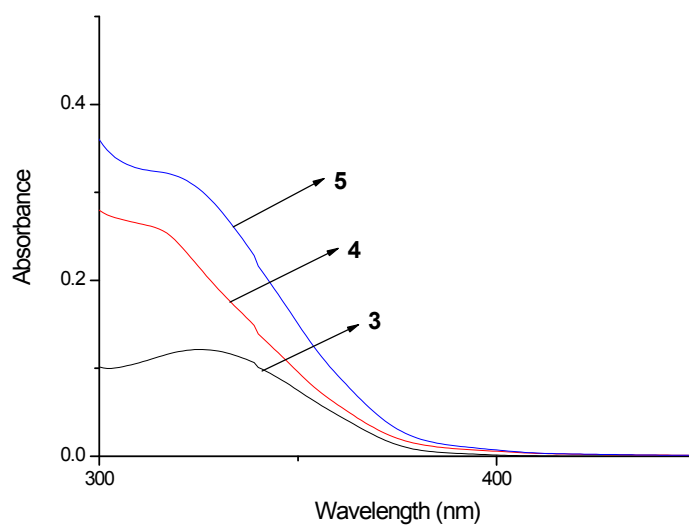

**Figure S22** The UV-Vis absorption spectra of compounds **3**, **4** and **5** in THF solution ( $1 \times 10^{-5}$  M).

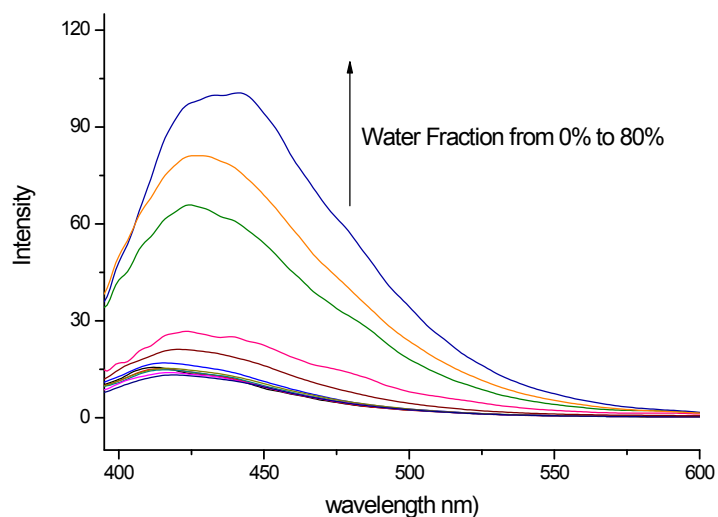

**Figure S22** The fluorescence spectra of compound **3** with different fractions of H<sub>2</sub>O in THF/H<sub>2</sub>O mixtures ( $1 \times 10^{-5}$  M,  $\lambda_{\text{ex}} = 330$  nm).

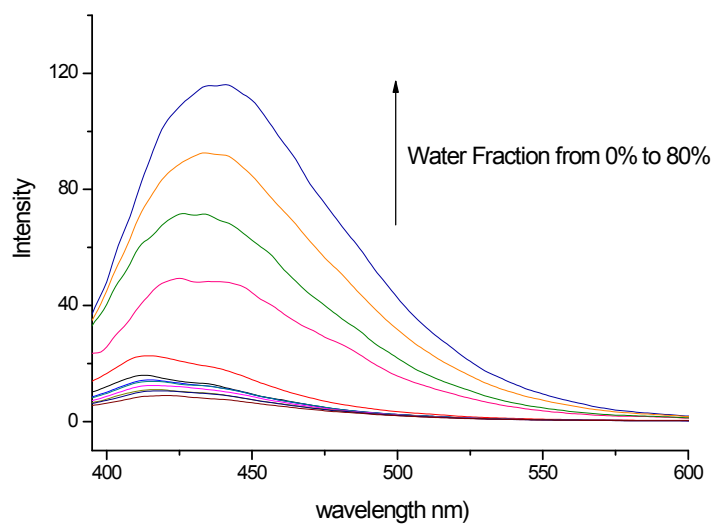

**Figure S23** The fluorescence spectra of compound **4** with different fractions of H<sub>2</sub>O in THF/H<sub>2</sub>O mixtures ( $1 \times 10^{-5}$  M,  $\lambda_{\text{ex}} = 330$  nm).

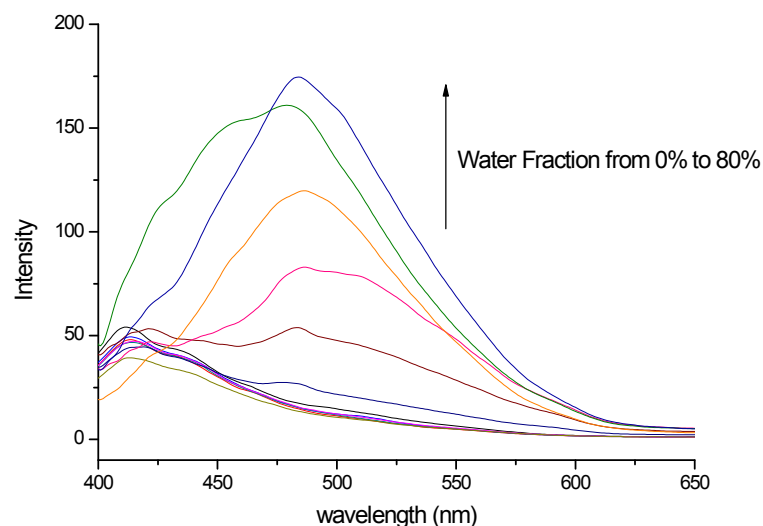

**Figure S24** The fluorescence spectra of compound **5** with different fractions of H<sub>2</sub>O in THF/H<sub>2</sub>O mixtures ( $1 \times 10^{-5}$  M,  $\lambda_{\text{ex}} = 330$  nm).

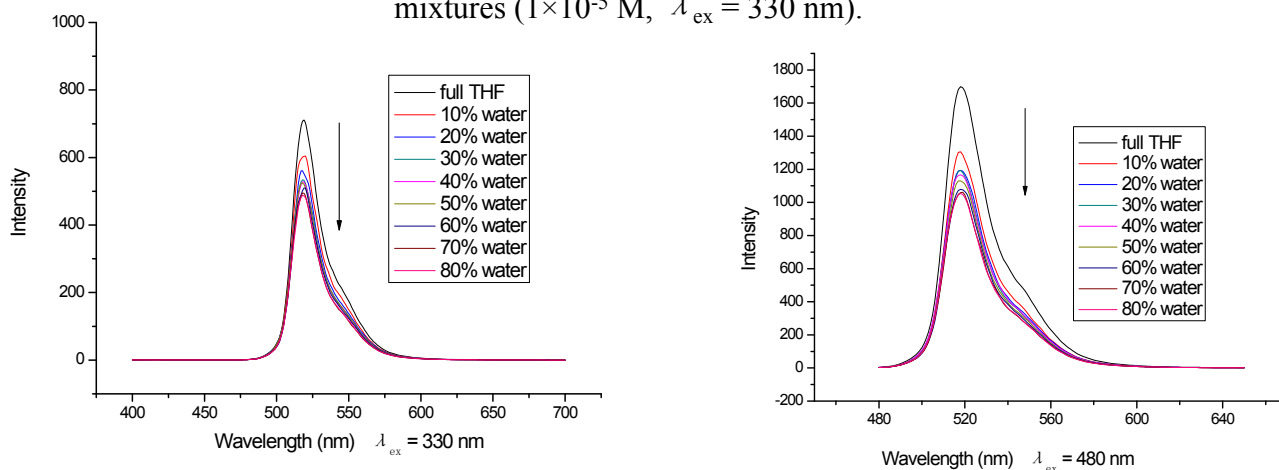

**Figure S25** The fluorescence spectra of compound **6** with different fractions of H<sub>2</sub>O in THF/H<sub>2</sub>O mixtures ( $1 \times 10^{-5}$  M).

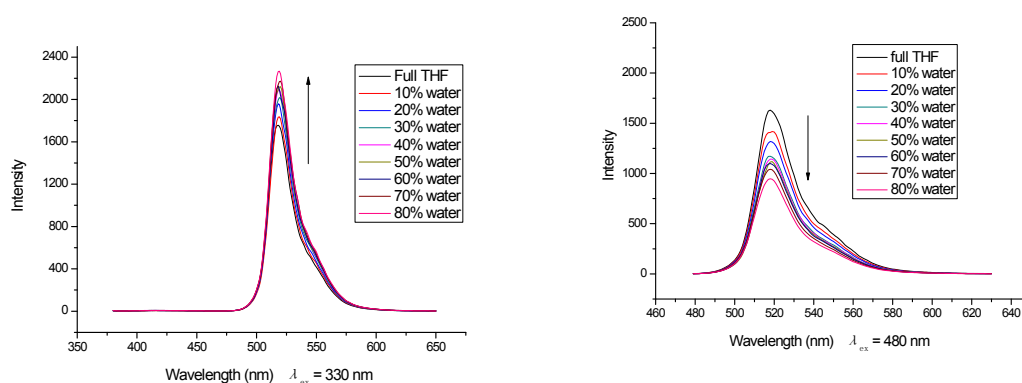

**Figure S26** The fluorescence spectra of compound **7** with different fractions of H<sub>2</sub>O in THF/H<sub>2</sub>O mixtures ( $1 \times 10^{-5}$  M).

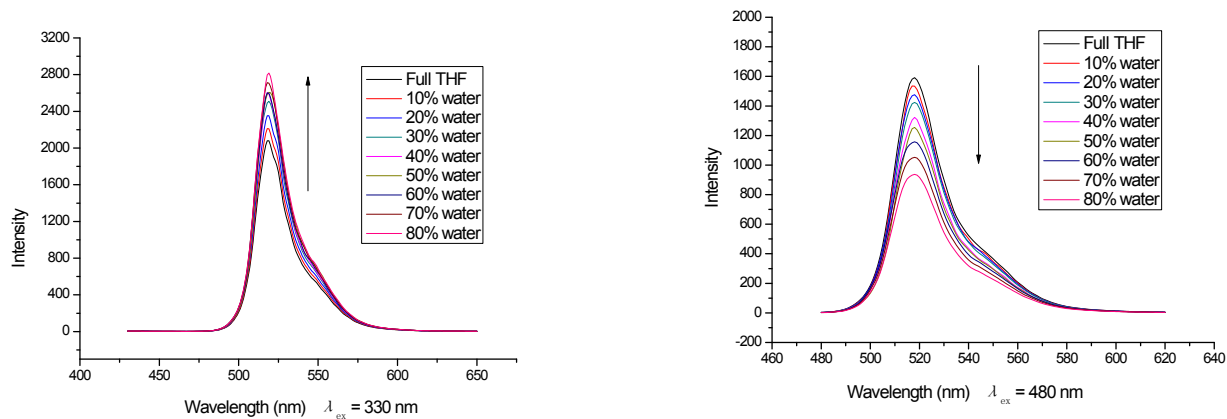

**Figure S27** The fluorescence spectra of compound **8** with different fractions of H<sub>2</sub>O in THF/H<sub>2</sub>O mixtures ( $1 \times 10^{-5}$  M).

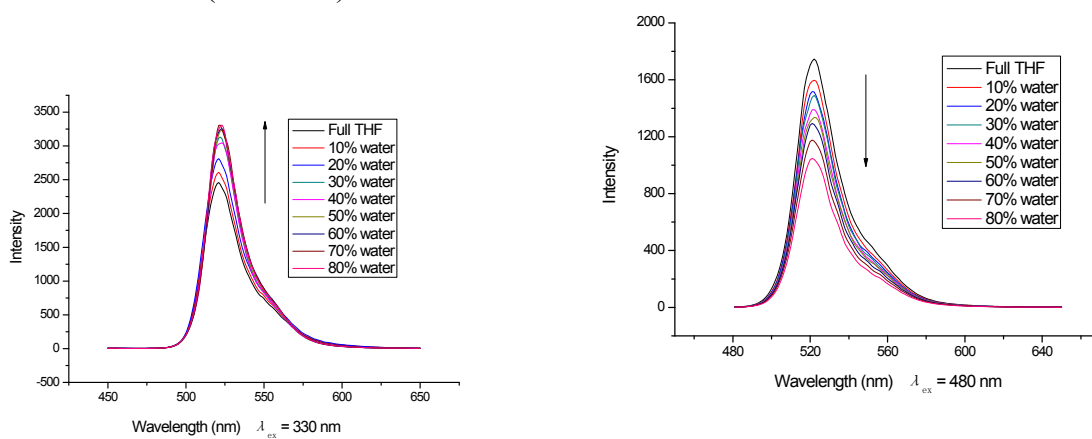

**Figure S28** The fluorescence spectra of compound **9** with different fractions of H<sub>2</sub>O in THF/H<sub>2</sub>O mixtures ( $1 \times 10^{-5}$  M).

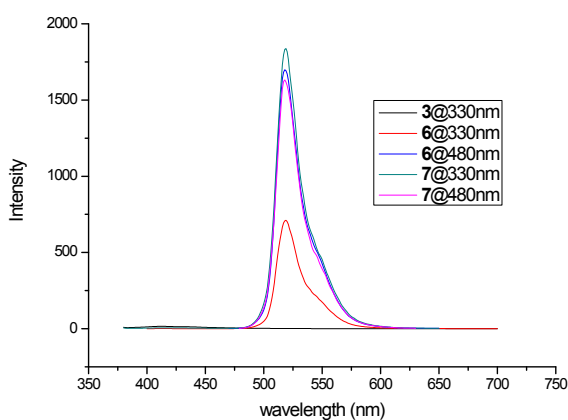

**Figure S29** The fluorescence spectra of compound **3**, **6** and **7** ( $1 \times 10^{-5}$  M in THF solution) excited at  $\lambda = 330$  and  $480$  nm, respectively.

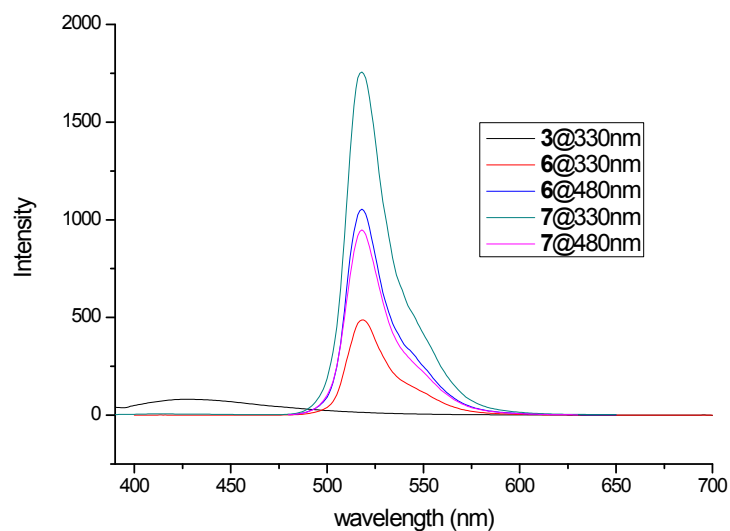

**Figure S30** The fluorescence spectra of compound **3**, **6** and **7** ( $1 \times 10^{-5}$  M in THF/water( $V:V=2:8$ )) excited at  $\lambda = 330$  and 480 nm, respectively.

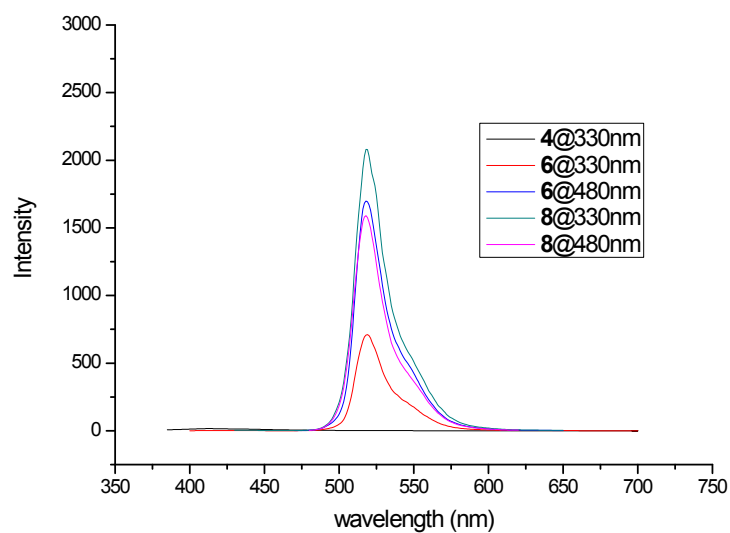

**Figure S31** The fluorescence spectra of compound **3**, **6** and **8** ( $1 \times 10^{-5}$  M in THF solution) excited at  $\lambda = 330$  and 480 nm, respectively.

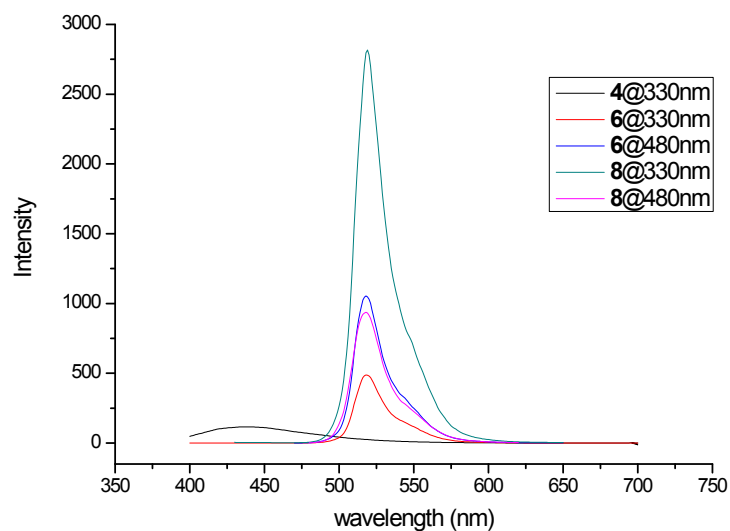

**Figure S32** The fluorescence spectra of compound **3**, **6** and **8** ( $1 \times 10^{-5}$  M in THF/water( $V:V=2:8$ )) excited at  $\lambda = 330$  and 480 nm, respectively.

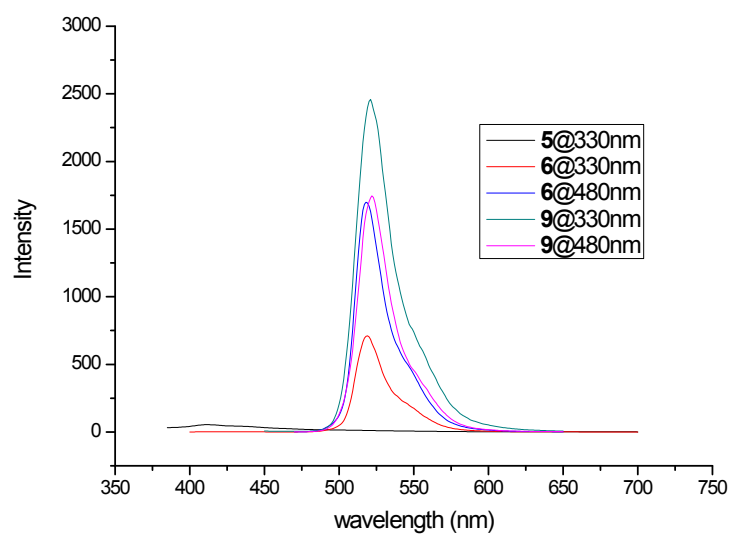

**Figure S33** The fluorescence spectra of compound **3**, **6** and **9** ( $1 \times 10^{-5}$  M in THF solution) excited at  $\lambda = 330$  and 480 nm, respectively.

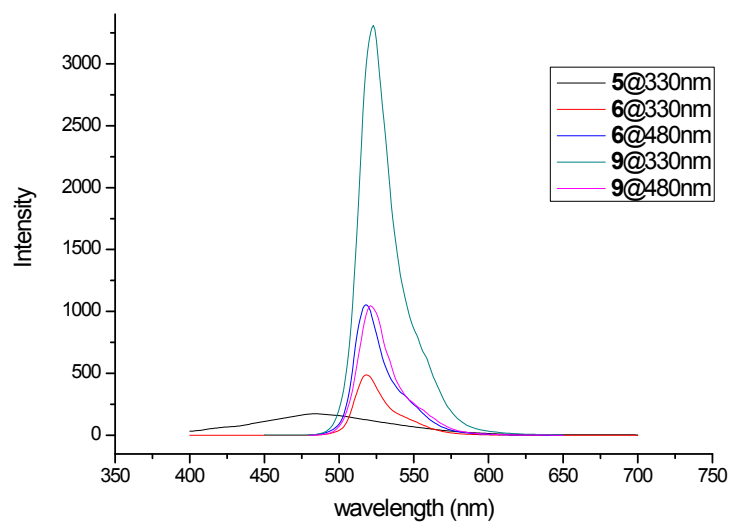

**Figure S34** The fluorescence spectra of compound **3**, **6** and **9** ( $1 \times 10^{-5}$  M in THF/water( $V:V=2:8$ )) excited at  $\lambda = 330$  and 480 nm, respectively.

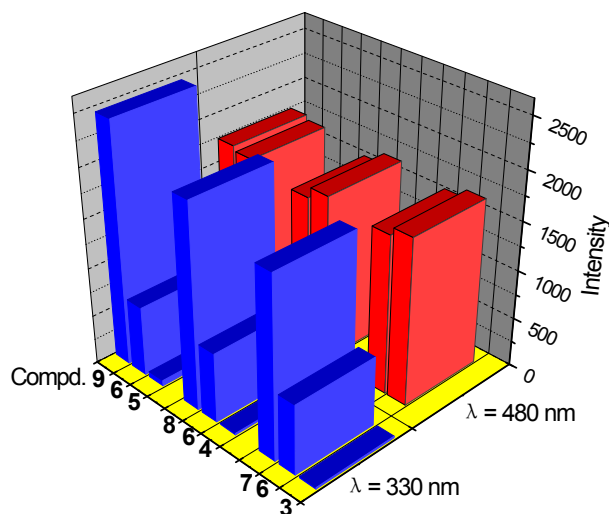

**Figure S35** Comparative emission maxima ( $1 \times 10^{-5}$  M in THF) of compounds **3**, **4**, **5**, **6**, **7**, **8** and **9** excited at  $\lambda = 330$  and 480 nm, respectively.



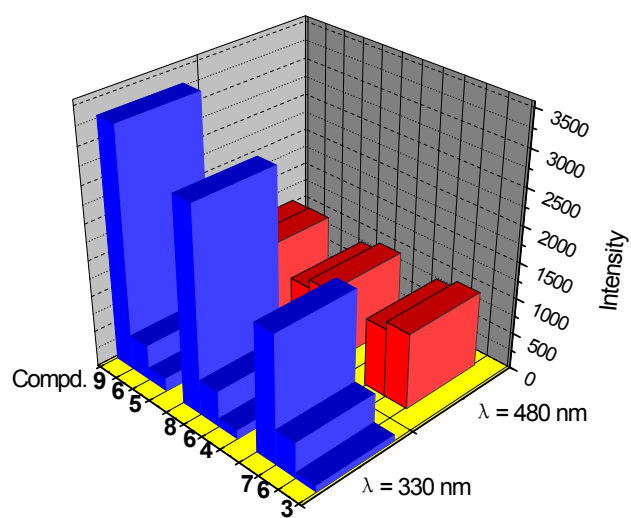

**Figure S36** Comparative emission maxima ( $1 \times 10^{-5}$  M in THF/water( $V:V=2:8$ )) of compounds **3**, **4**, **5**, **6**, **7**, **8** and **9** excited at  $\lambda = 330$  and 480 nm, respectively.
